# Supplementary material for: Superior Response and Survival of Intensive Chemotherapy Over Venetoclax Plus Azacitidine in Newly Diagnosed KIT-Mutated Acute Myeloid Leukemia
Source: Research Square preprint supplement (doi:10.21203/rs.3.rs-8030948/v1), 2025-11-20
Supplement: Supplementary file 1 [file 0faef08ae9ddf43890408ed9.pdf]

Supplementary information for

**Superior Response and Survival of Intensive Chemotherapy Over Venetoclax  
Plus Azacitidine in Newly Diagnosed KIT-Mutated Acute Myeloid Leukemia**

Qingli Ji<sup>1</sup>, Xinwen Jiang<sup>1</sup>, Xiaoqing Li<sup>1</sup>, Chen Cao<sup>1</sup>, Xinrui Zhang<sup>1</sup>, Minran Zhou<sup>1</sup>,  
Sai Ma<sup>1</sup>, Chunyan Chen<sup>1</sup>, \*

<sup>1</sup>Department of Hematology, Qilu Hospital, Shandong University, Jinan, China

Annals of Hematology

**\* Correspondence to:**

Prof. Chunyan Chen

Department of Hematology, Qilu Hospital, Shandong University, No. 107 Wenhuxi  
Road, Jinan, 250012, China

E-mail: chency@sdu.edu.cn

## Supplementary Material

### Index

|                                                                                |      |
|--------------------------------------------------------------------------------|------|
| <b>A. List of Abbreviations</b> .....                                          | 3    |
| <b>B. Supplementary Table</b> .....                                            | 4-5  |
| Table S1. Spectrum of KIT Mutations                                            |      |
| Table S2. Impact of allo-HSCT on Survival in VA-Treated Patients               |      |
| <b>C. Supplementary Figures</b> .....                                          | 6-10 |
| Figure S1. Survival After PSM: IC vs VA in KIT-Mutated AML                     |      |
| Figure S2. Survival After PSM: KIT-Mutated vs Wild-Type in VA-Treated Patients |      |
| Figure S3. Impact of NRAS Co-mutations in KIT-Mutated AML                      |      |
| Figure S4. Impact of FLT3-ITD/TKD Co-mutations in KIT-Mutated AML              |      |
| Figure S5. KIT Mutation Clearance at 3, 6, and 12 Months by Mutation Subgroup. |      |

### **A. List of Abbreviations**

|           |                                                       |
|-----------|-------------------------------------------------------|
| AML       | acute myeloid leukemia                                |
| IC        | Intensive Chemotherapy                                |
| VA        | Venetoclax plus Azacitidine                           |
| EFS       | Event-Free Survival                                   |
| OS        | Overall Survival                                      |
| CR        | Complete Remission                                    |
| ORR       | Overall Response Rate                                 |
| MRD       | Minimal Residual Disease                              |
| PSM       | Propensity Score Matching                             |
| ELN       | European LeukemiaNet                                  |
| FAB       | French-American-British                               |
| ECOG      | Eastern Cooperative Oncology Group                    |
| HR        | Hazard Ratio                                          |
| CI        | Confidence Interval                                   |
| allo-HSCT | Allogeneic Hematopoietic Stem Cell<br>Transplantation |

## B. Supplementary Table

**Table S1. Spectrum and Distribution of KIT Mutations in 67 Patients with KIT-Mutated AML**

| KIT mutation  | Number of Mutation Events | Percentage (%) |
|---------------|---------------------------|----------------|
| Exon 17       | 53                        | 79.10          |
| D816V         | 35                        | 66.04          |
| D816Y         | 5                         | 9.43           |
| D816H         | 3                         | 5.66           |
| N822K         | 17                        | 32.08          |
| Other exon 17 | 1                         | 1.89           |
| Exon 8        | 14                        | 20.90          |
| Other exons   | 5                         | 7.46           |

This table details the distribution of specific KIT mutations identified in the study cohort of 67 KIT-mutated AML patients. As some patients harbored multiple KIT mutations, the total number of mutational events exceeds the number of patients. Mutations are categorized by exon location, with exon 17 mutations further subdivided by specific amino acid changes. The D816V variant was the most prevalent. Percentages for individual exon 17 mutations are calculated relative to the total number of patients with exon 17 mutations (n=53), while all other percentages are calculated relative to the total KIT-mutated cohort (n=67).

**Table S2. Impact of allo-HSCT on Survival in VA-Treated Patients****A. Time-Dependent Cox Regression Analysis**

| Outcome | HR (95% CI)      | P-value |
|---------|------------------|---------|
| OS      | 0.11 (0.02–0.77) | 0.027   |
| EFS     | 0.09 (0.01–0.62) | 0.015   |

**B. Landmark Sensitivity Analysis**

| Landmark Time (months) | P-value | Total Patients | Transplanted Patients |
|------------------------|---------|----------------|-----------------------|
| 4                      | 0.589   | 146            | 1                     |
| 6                      | 0.089   | 137            | 9                     |
| 8                      | 0.022   | 121            | 13                    |

**C. Cohort Characteristics**

| Characteristic          | Number of Patients |
|-------------------------|--------------------|
| Total cohort            | 172                |
| Transplanted            | 14                 |
| Non-transplanted        | 158                |
| 6-month landmark cohort | 137                |

Analysis of allo-HSCT impact using time-dependent Cox regression to account for immortal time bias. The time-dependent analysis treated transplantation as a time-varying covariate. Landmark analyses were performed as sensitivity analyses at multiple time points.

## C. Supplementary Figures

**Figure S1. Survival After PSM: IC vs VA in KIT-Mutated AML**

(a) EFS in the matched cohorts.

(b) OS in the matched cohorts.

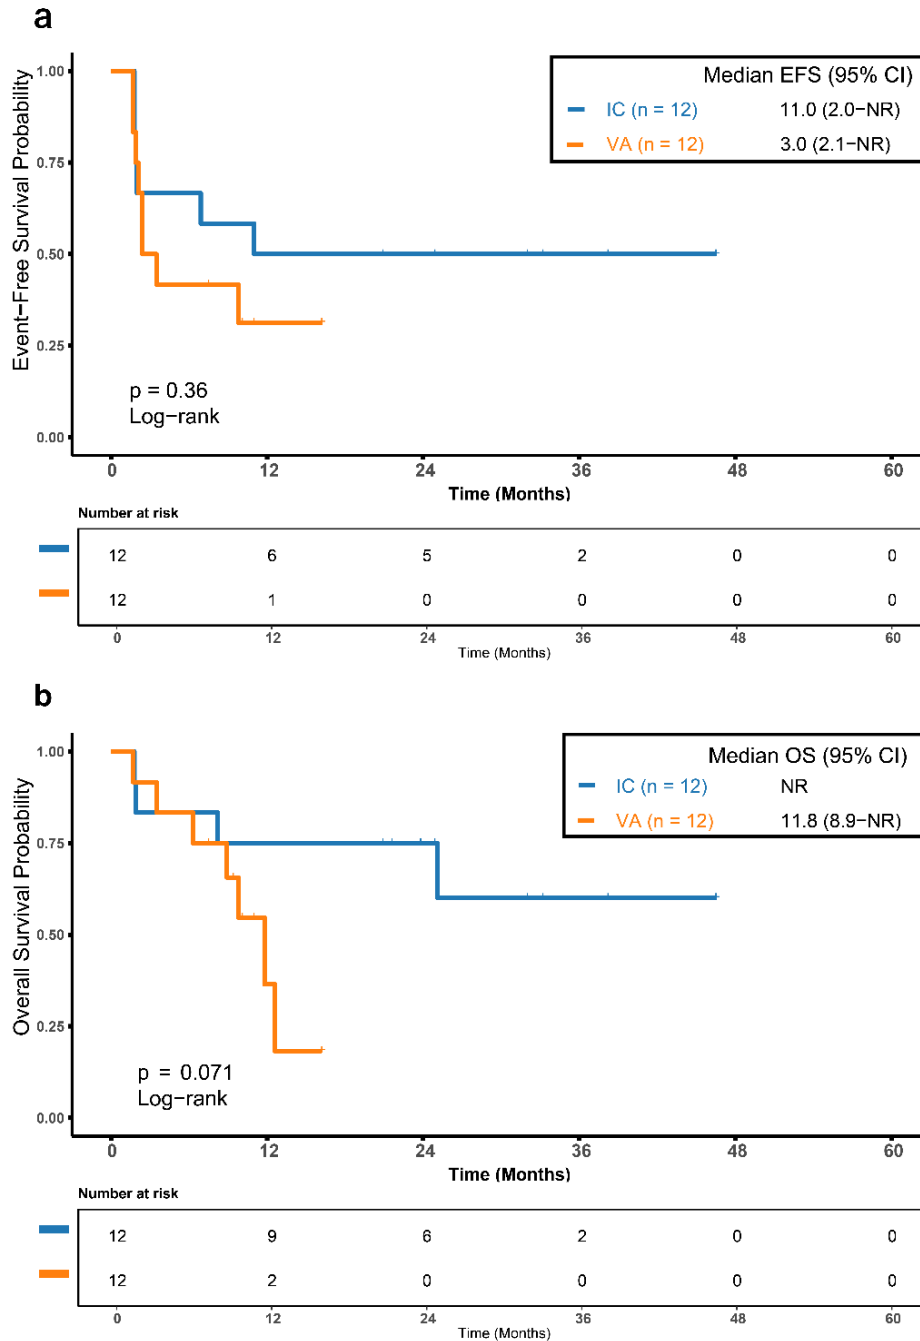

After PSM (12 pairs), the intensive chemotherapy cohort maintained numerical advantages in median EFS (11.0 vs 3.0 months,  $p=0.36$ ) and median OS (not reached vs 11.8 months,  $p=0.071$ ), although these differences were not statistically significant.

**Figure S2. Survival After PSM: KIT-Mutated vs Wild-Type in VA-Treated Patients**

(a) EFS in the matched cohorts.

(b) OS in the matched cohorts.

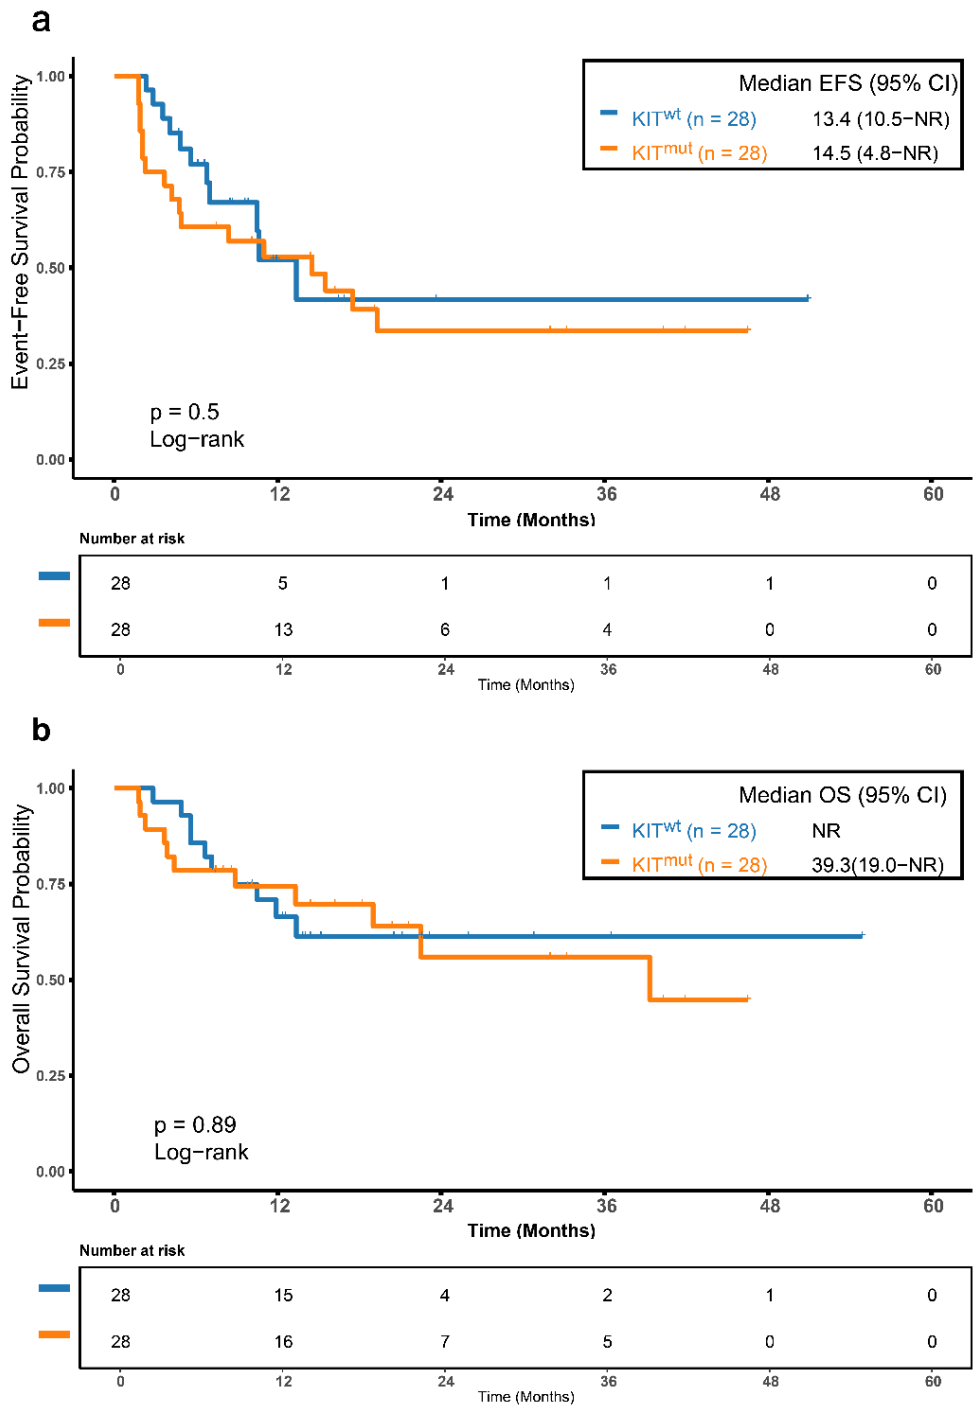

After PSM (28 pairs), differences in EFS (14.5 vs 13.4 months,  $p=0.5$ ) and OS (39.3 months vs not reached,  $p=0.89$ ) between KIT-mutated and wild-type patients were no longer statistically significant.

**Figure S3. Impact of NRAS Co-mutations in KIT-Mutated AML**

(a) EFS by NRAS mutation status.

(b) OS by NRAS mutation status.

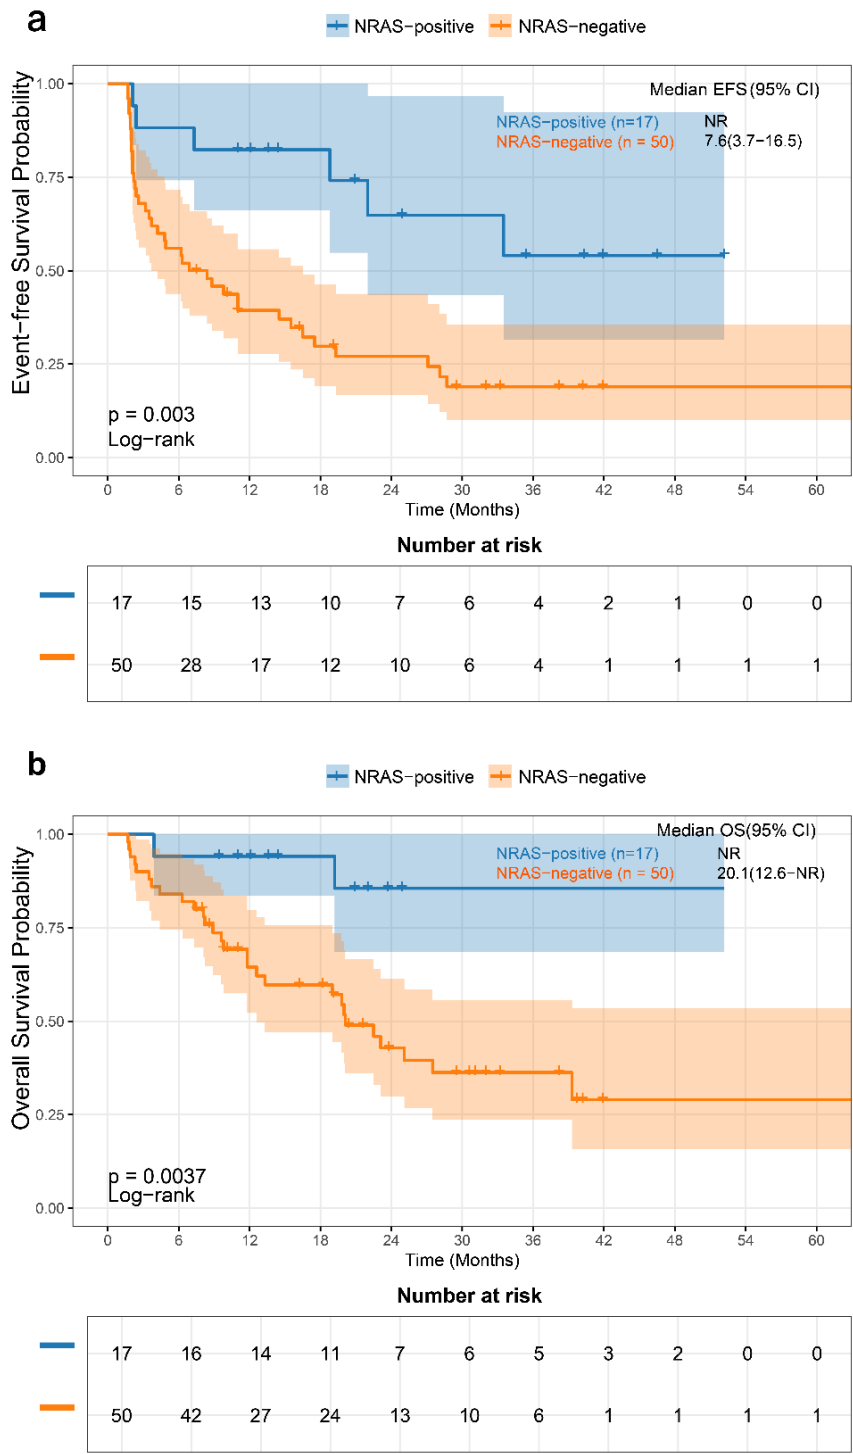

KIT-mutated patients with concurrent NRAS mutations had significantly longer EFS (not reached vs 7.6 months,  $p=0.003$ ) and OS (not reached vs 20.1 months,  $p=0.0037$ ) compared to NRAS wild-type patients.



**Figure S4. Impact of FLT3-ITD/TKD Co-mutations in KIT-Mutated AML**

(a) EFS by FLT3-ITD/TKD mutation status.

(b) OS by FLT3-ITD/TKD mutation status.

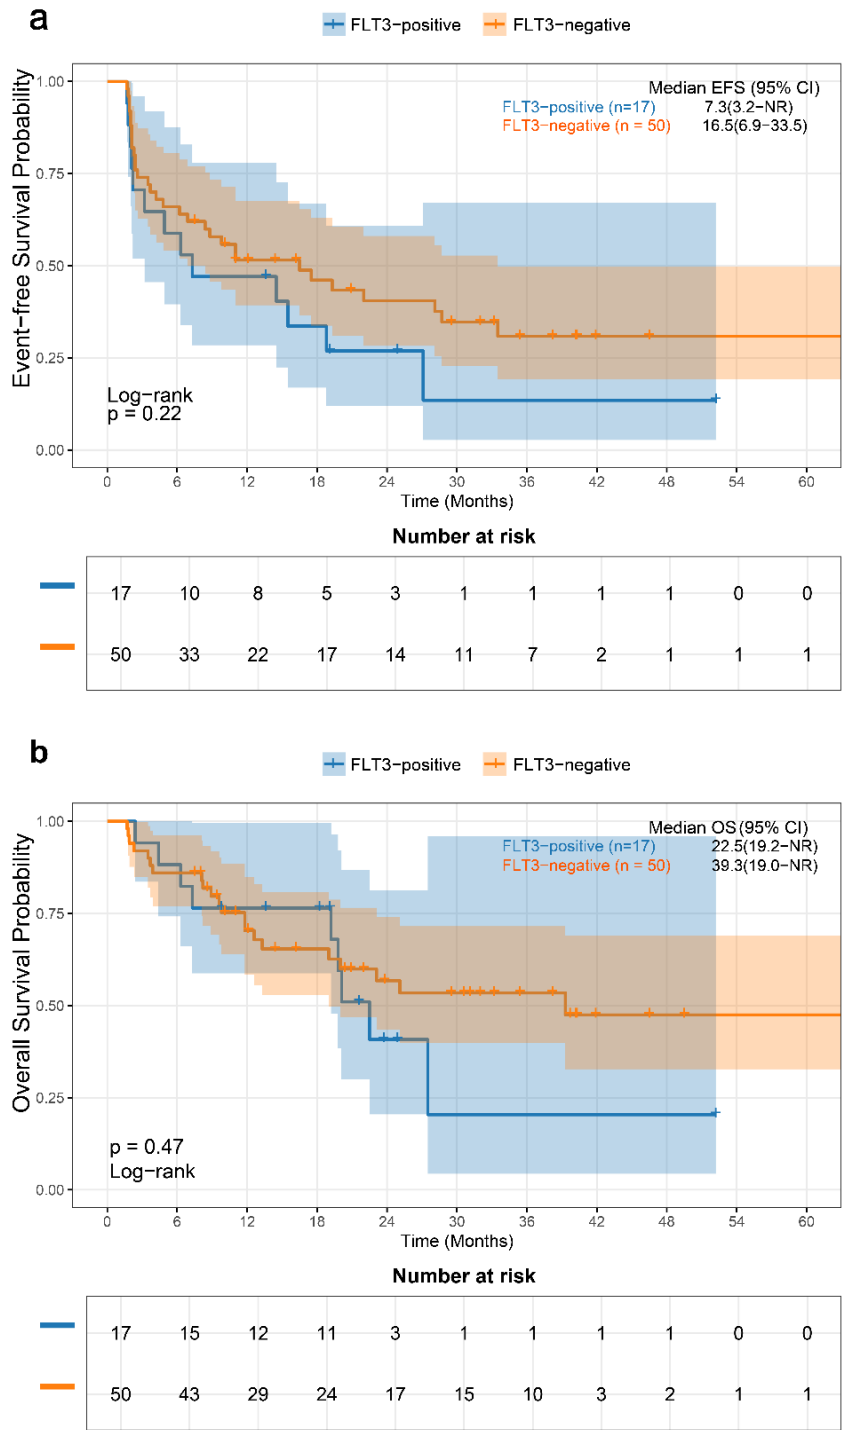

KIT-mutated patients with FLT3-ITD/TKD mutations showed a trend toward inferior median EFS (7.3 vs 16.5 months,  $p=0.22$ ) and median OS (22.5 vs 39.3 months,  $p=0.47$ ) compared to FLT3 wild-type patients, though these differences were not statistically significant.

**Figure S5. KIT Mutation Clearance Rates at 3, 6, and 12 Months by Mutation Subgroup**

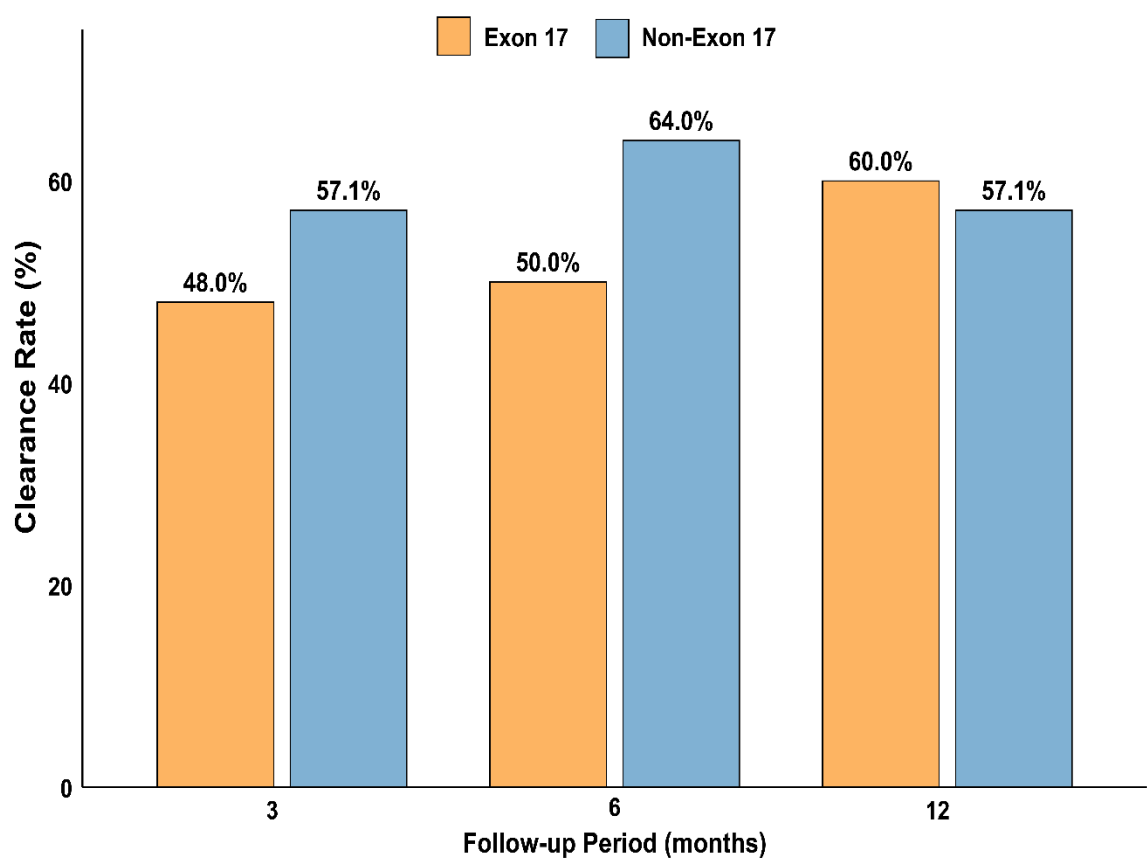

Bar graph comparing the rates of KIT mutation clearance, as assessed by next-generation sequencing, in patients with exon 17 mutations versus non-exon 17 mutations at 3, 6, and 12 months after treatment initiation
